# Supplementary material for: Hyperglycemia acts in synergy with hypoxia to maintain the pro-inflammatory phenotype of macrophages
Source: PubMed Central journal article supplement (PMC6695165; doi:10.1371/journal.pone.0220577), 2019-08-15
Supplement: pone.0220577.s001.pdf [file pone.0220577.s001.pdf]

| <b>Name</b>                          | <b>primer</b>             |
|--------------------------------------|---------------------------|
| TNF- $\alpha$ Forward                | GCCCTGTGAGGAGGACGAACA     |
| TNF- $\alpha$ Reverse                | GGTGTCTGAAGGAGGGGTAATAAA  |
| GAPDH Forward                        | CAGAGTTAAAAGCAGCCCTGGT    |
| GAPDH Reverse                        | GAAGGTGAAGTCCGGAGTCAAC    |
| Class B scavenger receptor - Forward | CTGGGCTCTTACGGTGTTT       |
| Class B scavenger receptor - Reverse | ACTGATCGGAATGCCAGAAGTCAAC |
| CD36 - Forward                       | ATTGGGAAAGTCACTGCGACAT    |
| CD36 - Reverse                       | CGTCGGATTCAAATACAGCATAGAT |
| SOCS3-Forward                        | ATCCTGGTGACAT GCTCCTC     |
| SOCS3-Reverse                        | CAAATGTGCTTCCCCCTTA       |
| IL-1 $\alpha$ Forward                | AATGACGCCCTCAATCAAAG      |
| IL-1 $\alpha$ Reverse                | TGGGTATCTCAGGCATCTCC      |
| IL-6 Forward                         | GATGAGTACAAAAGTCCTGATCCA  |
| IL-6 Reverse                         | CTGCAGCCACTGGTTCTGT       |
| GM-CSF Forward                       | CCTGTGCAACCCAGATTATCACC   |
| GM-CSF reverse                       | CCCACCCCTTGGTCCCTC        |
| TGF- $\beta$ 1 Forward               | GTGGACATCAACGGGTTCACTA    |
| TGF- $\beta$ 1 Reverse               | CTCCGTGGAGCTGAAGCAATA     |
